# Supplementary material for: Detailed Structural-Functional Analysis of the Krüppel-like Factor 16 (KLF16) Transcription Factor Reveals Novel Mechanisms for Silencing Sp/KLF Sites Involved in Metabolism and Endocrinology
Source: PubMed Central journal article supplement — J Biol Chem. 2011 Dec 27;287(10):7010–25. doi: 10.1074/jbc.M111.266007 (PMC3293586; doi:10.1074/jbc.m111.266007), 2011-12-27
Supplement: supp_M111.266007_jbc.M111.266007-1.pdf [file supp_M111.266007_jbc.M111.266007-1.pdf]

**Table 1: Ontological analysis of genome-wide bioinformatics analysis using KLF16 and BTE consensus sequences as probes.**

| GOID       | Term                                                                                         | Matches | Total | p        |
|------------|----------------------------------------------------------------------------------------------|---------|-------|----------|
| GO:0008152 | metabolic process                                                                            | 105     | 6961  | 8.62E-03 |
| GO:0044238 | primary metabolic process                                                                    | 97      | 6295  | 8.99E-03 |
| GO:0044237 | cellular metabolic process                                                                   | 93      | 6043  | 1.44E-02 |
| GO:0019219 | regulation of nucleobase, nucleoside, nucleotide and nucleic acid metabolic process          | 57      | 3356  | 2.96E-02 |
| GO:0051171 | regulation of nitrogen compound metabolic process                                            | 57      | 3435  | 4.31E-02 |
| GO:0009889 | regulation of biosynthetic process                                                           | 56      | 3323  | 3.38E-02 |
| GO:0031326 | regulation of cellular biosynthetic process                                                  | 55      | 3296  | 4.62E-02 |
| GO:0009058 | biosynthetic process                                                                         | 53      | 2424  | 8.06E-05 |
| GO:0010556 | regulation of macromolecule biosynthetic process                                             | 53      | 3129  | 4.25E-02 |
| GO:0051252 | regulation of RNA metabolic process                                                          | 52      | 2914  | 1.96E-02 |
| GO:2000112 | regulation of cellular macromolecule biosynthetic process                                    | 52      | 3068  | 4.60E-02 |
| GO:0048856 | anatomical structure development                                                             | 52      | 3087  | 4.85E-02 |
| GO:0044249 | cellular biosynthetic process                                                                | 50      | 2328  | 3.09E-04 |
| GO:0006355 | regulation of transcription, DNA-dependent                                                   | 50      | 2854  | 2.96E-02 |
| GO:0048731 | system development                                                                           | 48      | 2769  | 4.60E-02 |
| GO:0006139 | nucleobase, nucleoside, nucleotide and nucleic acid metabolic process                        | 47      | 2633  | 2.96E-02 |
| GO:0048522 | positive regulation of cellular process                                                      | 44      | 2443  | 3.62E-02 |
| GO:0034645 | cellular macromolecule biosynthetic process                                                  | 37      | 1600  | 1.46E-03 |
| GO:0009059 | macromolecule biosynthetic process                                                           | 37      | 1620  | 1.93E-03 |
| GO:0010467 | gene expression                                                                              | 37      | 1760  | 1.05E-02 |
| GO:0032774 | RNA biosynthetic process                                                                     | 27      | 931   | 3.85E-04 |
| GO:0006351 | transcription, DNA-dependent                                                                 | 26      | 844   | 1.89E-04 |
| GO:0006357 | regulation of transcription from RNA polymerase II promoter                                  | 22      | 921   | 2.87E-02 |
| GO:0051173 | positive regulation of nitrogen compound metabolic process                                   | 21      | 840   | 2.17E-02 |
| GO:0009888 | tissue development                                                                           | 21      | 889   | 3.34E-02 |
| GO:0031328 | positive regulation of cellular biosynthetic process                                         | 21      | 899   | 3.80E-02 |
| GO:0009891 | positive regulation of biosynthetic process                                                  | 21      | 915   | 4.60E-02 |
| GO:0045935 | positive regulation of nucleobase, nucleoside, nucleotide and nucleic acid metabolic process | 20      | 816   | 2.96E-02 |
| GO:0051254 | positive regulation of RNA metabolic process                                                 | 19      | 733   | 2.38E-02 |
| GO:0045944 | positive regulation of transcription from RNA polymerase II promoter                         | 16      | 482   | 6.04E-03 |
| GO:0031667 | response to nutrient levels                                                                  | 12      | 289   | 4.63E-03 |
| GO:0009991 | response to extracellular stimulus                                                           | 12      | 311   | 9.03E-03 |
| GO:0001501 | skeletal system development                                                                  | 11      | 312   | 2.30E-02 |
| GO:0006366 | transcription from RNA polymerase II promoter                                                | 10      | 289   | 3.34E-02 |
| GO:0007423 | sensory organ development                                                                    | 10      | 302   | 4.57E-02 |
| GO:0007584 | response to nutrient                                                                         | 9       | 198   | 1.32E-02 |
| GO:0046039 | GTP metabolic process                                                                        | 7       | 153   | 2.96E-02 |
| GO:0045598 | regulation of fat cell differentiation                                                       | 6       | 42    | 7.05E-05 |
| GO:0007565 | female pregnancy                                                                             | 6       | 126   | 4.05E-02 |
| GO:0033273 | response to vitamin                                                                          | 6       | 129   | 4.55E-02 |

|            |                                                                                      |   |    |          |
|------------|--------------------------------------------------------------------------------------|---|----|----------|
| GO:0008589 | regulation of smoothened signaling pathway                                           | 4 | 32 | 4.52E-03 |
| GO:0060021 | palate development                                                                   | 4 | 48 | 2.00E-02 |
| GO:0030511 | positive regulation of transforming growth factor beta<br>receptor signaling pathway | 3 | 17 | 4.85E-03 |
| GO:0046697 | decidualization                                                                      | 3 | 17 | 4.85E-03 |
| GO:0009220 | pyrimidine ribonucleotide biosynthetic process                                       | 3 | 17 | 4.85E-03 |
| GO:0009218 | pyrimidine ribonucleotide metabolic process                                          | 3 | 18 | 6.17E-03 |
| GO:0001893 | maternal placenta development                                                        | 3 | 20 | 9.32E-03 |
| GO:0045599 | negative regulation of fat cell differentiation                                      | 3 | 21 | 1.12E-02 |
| GO:0006221 | pyrimidine nucleotide biosynthetic process                                           | 3 | 24 | 1.48E-02 |
| GO:0046131 | pyrimidine ribonucleoside metabolic process                                          | 3 | 25 | 1.60E-02 |
| GO:0002053 | positive regulation of mesenchymal cell proliferation                                | 3 | 28 | 2.35E-02 |
| GO:0010464 | regulation of mesenchymal cell proliferation                                         | 3 | 31 | 2.96E-02 |
| GO:0007416 | synapse assembly                                                                     | 3 | 33 | 3.38E-02 |
| GO:0072528 | pyrimidine-containing compound biosynthetic process                                  | 3 | 35 | 4.20E-02 |
| GO:0043588 | skin development                                                                     | 3 | 36 | 4.57E-02 |
| GO:0045161 | neuronal ion channel clustering                                                      | 2 | 8  | 8.62E-03 |
| GO:0009396 | folic acid-containing compound biosynthetic process                                  | 2 | 8  | 8.62E-03 |
| GO:0046655 | folic acid metabolic process                                                         | 2 | 9  | 1.26E-02 |
| GO:0040015 | negative regulation of multicellular organism growth                                 | 2 | 9  | 1.26E-02 |
| GO:0048194 | Golgi vesicle budding                                                                | 2 | 10 | 1.48E-02 |
| GO:0048200 | Golgi transport vesicle coating                                                      | 2 | 10 | 1.48E-02 |
| GO:0048205 | COPI coating of Golgi vesicle                                                        | 2 | 10 | 1.48E-02 |
| GO:0000768 | syncytium formation by plasma membrane fusion                                        | 2 | 10 | 1.48E-02 |
| GO:0007520 | myoblast fusion                                                                      | 2 | 10 | 1.48E-02 |
| GO:0006183 | GTP biosynthetic process                                                             | 2 | 11 | 1.80E-02 |
| GO:0006228 | UTP biosynthetic process                                                             | 2 | 11 | 1.80E-02 |
| GO:0046051 | UTP metabolic process                                                                | 2 | 11 | 1.80E-02 |
| GO:0071320 | cellular response to cAMP                                                            | 2 | 11 | 1.80E-02 |
| GO:0007213 | muscarinic acetylcholine receptor signaling pathway                                  | 2 | 12 | 2.30E-02 |
| GO:0006949 | syncytium formation                                                                  | 2 | 12 | 2.30E-02 |
| GO:0009208 | pyrimidine ribonucleoside triphosphate metabolic<br>process                          | 2 | 12 | 2.30E-02 |
| GO:0009209 | pyrimidine ribonucleoside triphosphate biosynthetic<br>process                       | 2 | 12 | 2.30E-02 |
| GO:0006241 | CTP biosynthetic process                                                             | 2 | 12 | 2.30E-02 |
| GO:0046036 | CTP metabolic process                                                                | 2 | 12 | 2.30E-02 |
| GO:0043403 | skeletal muscle tissue regeneration                                                  | 2 | 12 | 2.30E-02 |
| GO:0046689 | response to mercury ion                                                              | 2 | 13 | 2.91E-02 |
| GO:0009148 | pyrimidine nucleoside triphosphate biosynthetic<br>process                           | 2 | 13 | 2.91E-02 |
| GO:0045880 | positive regulation of smoothened signaling pathway                                  | 2 | 13 | 2.91E-02 |
| GO:0043113 | receptor clustering                                                                  | 2 | 14 | 2.96E-02 |
| GO:0043586 | tongue development                                                                   | 2 | 15 | 3.60E-02 |
| GO:0014902 | myotube differentiation                                                              | 2 | 16 | 4.31E-02 |
| GO:0045600 | positive regulation of fat cell differentiation                                      | 2 | 16 | 4.31E-02 |
| GO:0009147 | pyrimidine nucleoside triphosphate metabolic process                                 | 2 | 16 | 4.31E-02 |
| GO:0002467 | germinal center formation                                                            | 1 | 5  | 4.85E-02 |
| GO:0031659 | positive regulation of cyclin-dependent protein kinase<br>activity involved in G1/S  | 1 | 5  | 4.85E-02 |
| GO:0032717 | negative regulation of interleukin-8 production                                      | 1 | 5  | 4.85E-02 |

|            |                                                                                |   |   |          |
|------------|--------------------------------------------------------------------------------|---|---|----------|
| GO:0051005 | negative regulation of lipoprotein lipase activity                             | 1 | 5 | 4.85E-02 |
| GO:2000344 | positive regulation of acrosome reaction                                       | 1 | 5 | 4.85E-02 |
| GO:2000018 | regulation of male gonad development                                           | 1 | 5 | 4.85E-02 |
| GO:0030970 | retrograde protein transport, ER to cytosol                                    | 1 | 5 | 4.85E-02 |
| GO:0007386 | compartment pattern formation                                                  | 1 | 5 | 4.85E-02 |
| GO:0009130 | pyrimidine nucleoside monophosphate biosynthetic process                       | 1 | 5 | 4.85E-02 |
| GO:0060023 | soft palate development                                                        | 1 | 5 | 4.85E-02 |
| GO:0061037 | negative regulation of cartilage development                                   | 1 | 5 | 4.85E-02 |
| GO:0002367 | cytokine production involved in immune response                                | 1 | 5 | 4.85E-02 |
| GO:0042092 | type 2 immune response                                                         | 1 | 5 | 4.85E-02 |
| GO:0048293 | regulation of isotype switching to IgE isotypes                                | 1 | 5 | 4.85E-02 |
| GO:0043570 | maintenance of DNA repeat elements                                             | 1 | 5 | 4.85E-02 |
| GO:0051096 | positive regulation of helicase activity                                       | 1 | 5 | 4.85E-02 |
| GO:2000278 | regulation of DNA biosynthetic process                                         | 1 | 5 | 4.85E-02 |
| GO:0051387 | negative regulation of nerve growth factor receptor signaling pathway          | 1 | 5 | 4.85E-02 |
| GO:0007023 | post-chaperonin tubulin folding pathway                                        | 1 | 5 | 4.85E-02 |
| GO:0006862 | nucleotide transport                                                           | 1 | 5 | 4.85E-02 |
| GO:0003032 | detection of oxygen                                                            | 1 | 5 | 4.85E-02 |
| GO:0033152 | immunoglobulin V(D)J recombination                                             | 1 | 5 | 4.85E-02 |
| GO:0045898 | regulation of RNA polymerase II transcriptional preinitiation complex assembly | 1 | 5 | 4.85E-02 |
| GO:0051798 | positive regulation of hair follicle development                               | 1 | 5 | 4.85E-02 |
| GO:0060346 | bone trabecula formation                                                       | 1 | 5 | 4.85E-02 |
| GO:0016139 | glycoside catabolic process                                                    | 1 | 5 | 4.85E-02 |
| GO:0044245 | polysaccharide digestion                                                       | 1 | 5 | 4.85E-02 |
