# Supplementary material for: Detailed Structural-Functional Analysis of the Krüppel-like Factor 16 (KLF16) Transcription Factor Reveals Novel Mechanisms for Silencing Sp/KLF Sites Involved in Metabolism and Endocrinology
Source: PubMed Central journal article supplement — J Biol Chem. 2011 Dec 27;287(10):7010–25. doi: 10.1074/jbc.M111.266007 (PMC3293586; doi:10.1074/jbc.m111.266007), 2011-12-27
Supplement: supp_M111.266007_jbc.M111.266007-2.pdf [file supp_M111.266007_jbc.M111.266007-2.pdf]

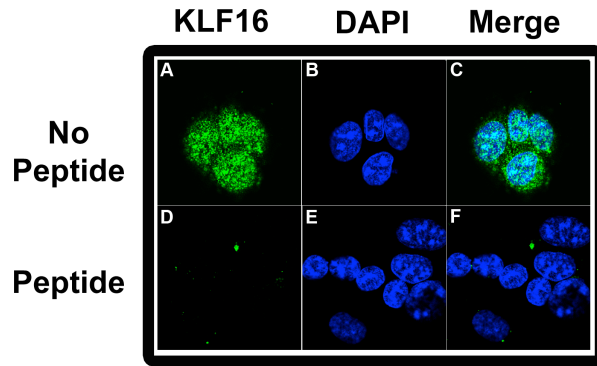

**Supplementary Figure 1:** In the absence of the epitope-specific peptide (Upper Row: A: KLF16, B: DAPI, C: Merge A and B) KLF16 expression was observed in the nuclei and the cytoplasm of uterine epithelial cells using Anti-KLF16 that our laboratory had generated. KLF16 expression was however not observed (Lower Row: D: KLF16, E: DAPI, F: Merge A and B) in either the nuclei or the cytoplasm of these cells after pre-incubation with 100X epitope-specific peptide confirming specificity of the antibody in immunofluorescence assays.
